# Supplementary material for: The Scenario of Ticks and Tick-Borne Pathogens of Sheep on a Mediterranean Island
Source: MDPI journal article supplement (doi:10.3390/microorganisms10081551), 2022-07-31
Supplement: s1 [file s1]

**Table S1.** Binary logistic regression models related to *Anaplasma ovis* and *Theileria ovis* infection presence in sheep

| <b>A. ovis model</b>                                                 |          |           |             |           |          |           | <b>95% CI</b> |              |
|----------------------------------------------------------------------|----------|-----------|-------------|-----------|----------|-----------|---------------|--------------|
| <b>Variable</b>                                                      | <b>B</b> | <b>SE</b> | <b>Wald</b> | <b>Df</b> | <b>p</b> | <b>OR</b> | <b>Lower</b>  | <b>Upper</b> |
| <i>Rhipicephalus turanicus</i> presence: yes                         | 2.099    | 0.445     | 22.280      | 1         | <0.001   | 8.154     | 3.412         | 19.490       |
| No of <i>Dermacentor marginatus</i> males                            | -0.286   | 0.141     | 4.150       | 1         | 0.042    | 0.751     | 0.570         | 0.989        |
| Constant                                                             | 1.080    | 0.155     | 48.462      | 1         | <0.001   | 2.943     |               |              |
| R <sup>2</sup> (Nagelkerke): 17.9%                                   |          |           |             |           |          |           |               |              |
| Omnibus Tests of Model Coefficients: $\chi^2$ (2) = 44.778, p< 0.001 |          |           |             |           |          |           |               |              |
| H-L test: $\chi^2$ (1) = 0.169, p = 0.681                            |          |           |             |           |          |           |               |              |
| <b>T. ovis model</b>                                                 |          |           |             |           |          |           |               |              |
| No of <i>R. turanicus</i> females                                    | 0.175    | 0.59      | 8.691       | 1         | 0.003    | 1.191     | 1.060         | 1.337        |
| Constant                                                             | 0.322    | 0.118     | 7.473       | 1         | 0.006    | 1.379     |               |              |
| R <sup>2</sup> (Nagelkerke): 4.2%                                    |          |           |             |           |          |           |               |              |
| Omnibus Tests of Model Coefficients: $\chi^2$ (1) = 12.150, p< 0.001 |          |           |             |           |          |           |               |              |
| H-L test: $\chi^2$ (2) = 1.468, p = 0.480                            |          |           |             |           |          |           |               |              |
